# Supplementary material for: Breakfast Consumption Habit and Its Nutritional Contribution in Latin America: Results from the ELANS Study
Source: MDPI journal article supplement (doi:10.3390/nu12082397), 2020-08-10
Supplement: s1 [file s1]

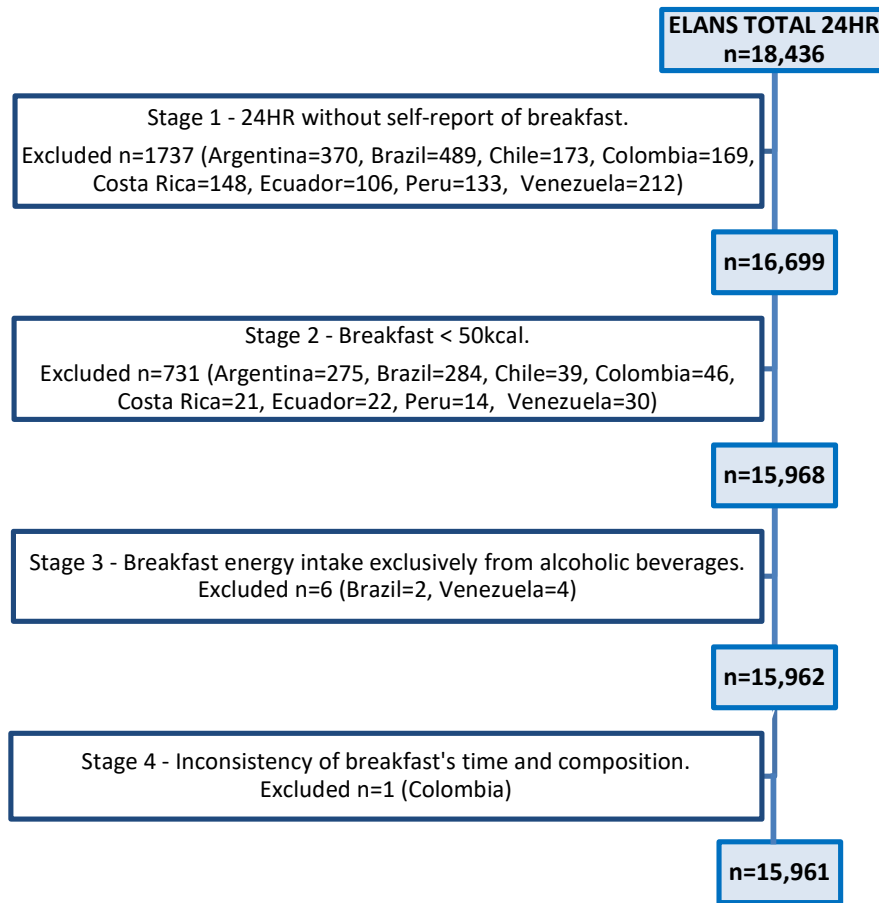

**Figure S1.** Flowchart of breakfast 24-HR selection. 24-HR reflects: 9218 individuals x 2 days of recall = 18,436 recalls.
